# Supplementary material for: Vinylene carbonate as a highly effective electrolyte additive for Li3VO4 anodes with enhanced electrochemical performance
Source: Royal Society of Chemistry journal article supplement (doi:10.1039/d3nj00992k), 2023-01-01
Supplement: d3nj00992k1.pdf [file d3nj00992k1.pdf]

## Supporting Information

### **Vinylene Carbonate as Highly Effective Electrolyte Additives for $\text{Li}_3\text{VO}_4$ Anodes with Enhanced Electrochemical Performance**

*Miaomiao Zhang<sup>a</sup>, Cunyuan Pei<sup>a\*</sup>, Huijuan Ma<sup>b</sup>, Zhongxu Dai<sup>a\*</sup>, Tao Li<sup>c</sup>, Ting Xiao<sup>d</sup>,  
Shibing Ni<sup>a\*</sup>*

*<sup>a</sup> College of Materials and Chemical Engineering, Key Laboratory of Inorganic Nonmetallic Crystalline and Energy Conversion Materials, China Three Gorges University, Yichang, 443002, China.*

*<sup>b</sup> Hubei Three Gorges Laboratory, Yichang, 443007, China.*

*<sup>c</sup> Analysis and Testing Center, China Three Gorges University, Yichang, 443002, China.*

*<sup>d</sup> College of Electrical Engineering & New Energy, China Three Gorges University, Yichang, 443002, China.*

*\* E-mail: peicunyuan@ctgu.edu.cn; daizx@ctgu.edu.cn; shibingni07@126.com*

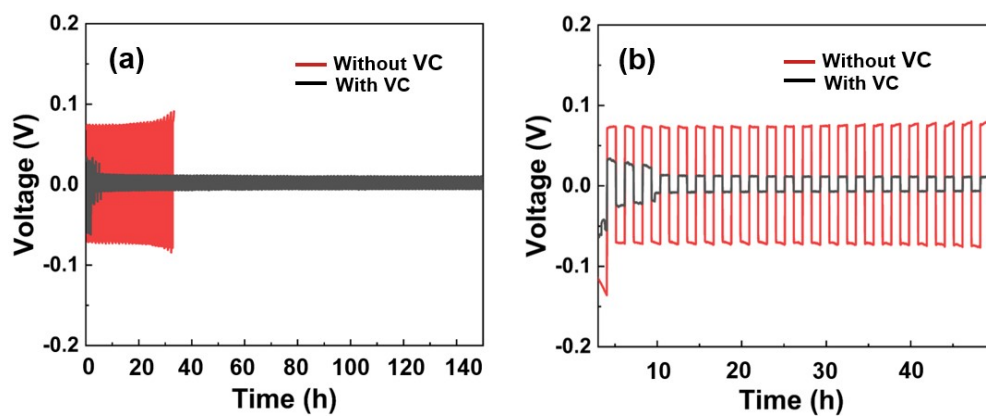

**Figure S1** The cycling performance of Li||Li symmetric cells with VC and without VC at the current density of  $0.5 \text{ mA cm}^{-2}$ . The cycle time is 145 hours (a) and 50 hours (b).

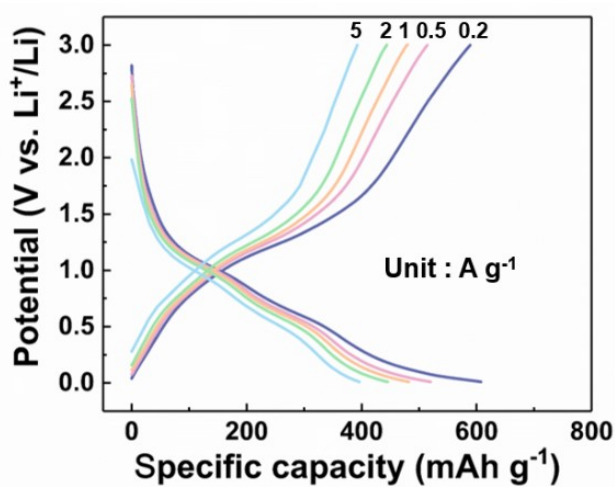

**Figure S2** The charge/discharge profiles of LVO in the electrolyte without VC at different current density.

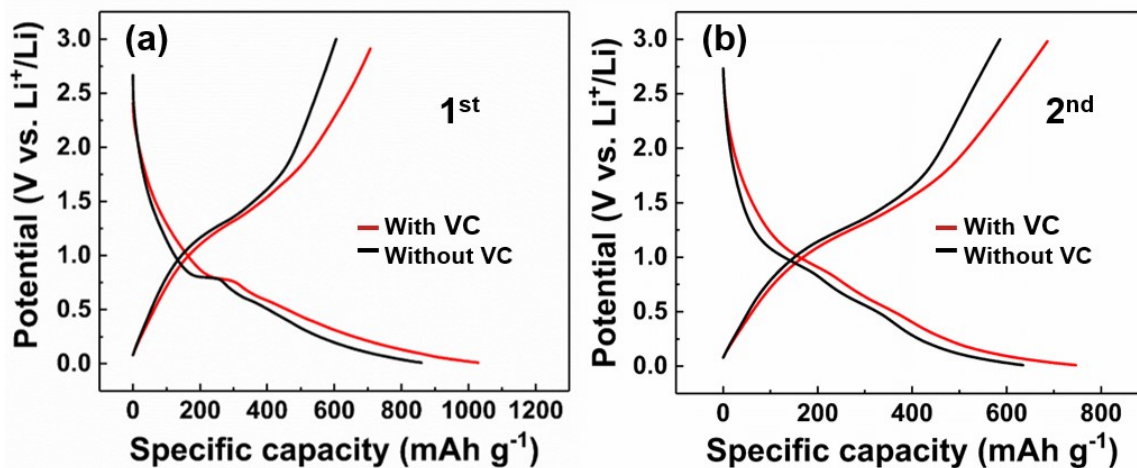

**Figure S3** The charge/discharge profiles of LVO in the electrolyte (a) with VC and (b) without VC at the current density of  $0.5 \text{ A g}^{-1}$ .

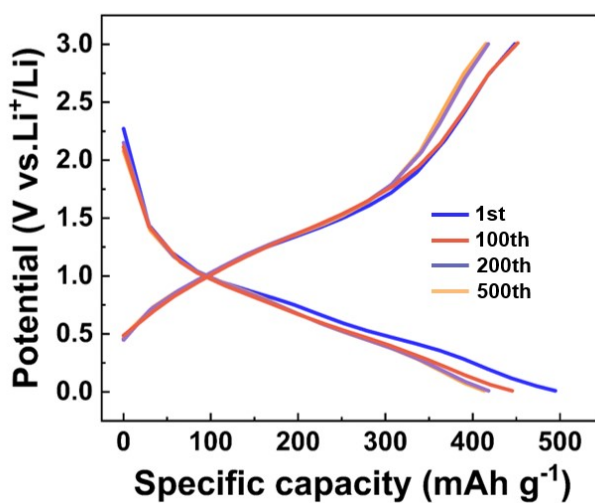

**Figure S4** The charge/discharge profiles of LVO in the electrolyte with VC at the current density of  $10.0 \text{ A g}^{-1}$ .

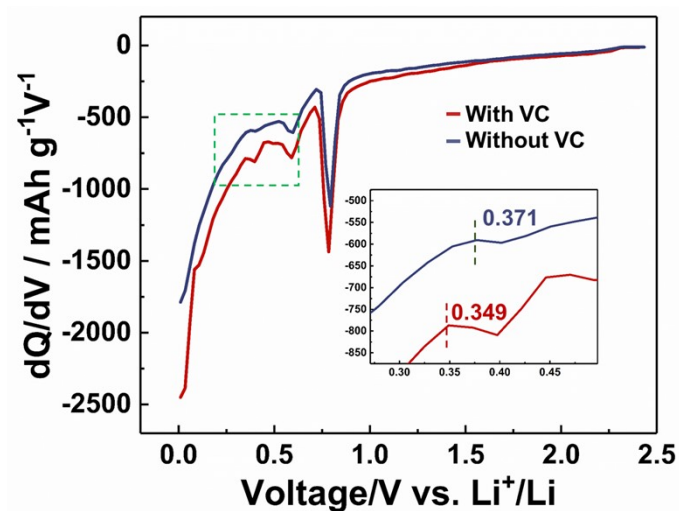

**Figure S5** The dQ/dV analysis for LVO/C in both the two electrolytes.

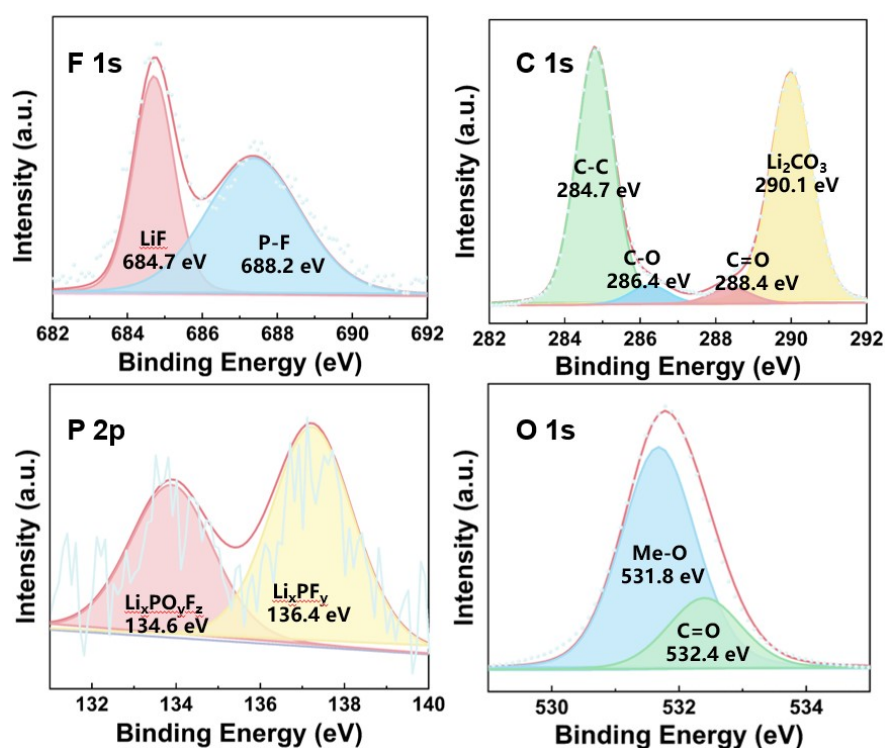

**Figure S6** (a) F 1s, (b) O 1s, (c) P 2p and (d) C 1s XPS survey spectra of LVO/C cycled in the without VC after 200 cycles.
